# Supplementary material for: Biomechanical response of lumbar facet joints under follower preload: a finite element study
Source: BMC Musculoskelet Disord. 2016 Mar 15;17:126. doi: 10.1186/s12891-016-0980-4 (PMC4791937; doi:10.1186/s12891-016-0980-4)
Supplement: Additional file 1: — Raw data of validation for the lumbar spine model. (XLSX 16 kb) [file 12891_2016_980_MOESM1_ESM.xlsx]

## Sheet: Sheet1
			Experiment	FEM by Renner	This Study			4.24
	Flexion- Extension	L1-L2	8.91	8.91	7.66368			2.97
		L2-L3	6.79	10.4	10.6615			1.91
		L3-L4	9.76	8.27	9.54378			4.24
		L4-L5	12.73	7.64	10.2316			3.4
		L5-S1	9.76	15.7	13.8141			5.4
	Lateral Bending	L1-L2	10.6	7.54	8.36299			6.6
		L2-L3	12.3	6.3	10.4322			2.93
		L3-L4	8.36	6.5	7.90443			3.1
		L4-L5	9.8	3.7	8.11651			1.4
		L5-S1	7.2	6.97	8.10505			1.13
	Torsion	L1-L2	3.72	1.71	2.34694			0.57
		L2-L3	1.19	1.67	2.40171			1.29
		L3-L4	1.56	1.52	3.20736			1.7
		L4-L5	3.74	1.2	3.66848			1.53
		L5-S1	2.86	3.15	3.422			0.35
	Compression	L1-L2	1.23	1.64	1.33			0.79
		L2-L3	1.48	1.89	1.506			0.51
		L3-L4	1.55	1.86	1.437			0.53
		L4-L5	1.55	2.02	1.571			0.5
		L5-S1	1.26	1.35	1.432
